RESEARCH ARTICLE

# *Salmonella* Typhimurium PagP- and UgtL-dependent resistance to antimicrobial peptides contributes to the gut colonization

Ryosuke Goto, Tsuyoshi Miki\*, Nao Nakamura, Mayuka Fujimoto, Nobuhiko Okada

Department of Microbiology, School of Pharmacy, Kitasato University, Tokyo, Japan

\* [mikit@pharm.kitasato-u.ac.jp](mailto:mikit@pharm.kitasato-u.ac.jp)

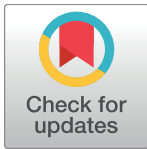

**OPEN ACCESS**

**Citation:** Goto R, Miki T, Nakamura N, Fujimoto M, Okada N (2017) *Salmonella* Typhimurium PagP- and UgtL-dependent resistance to antimicrobial peptides contributes to the gut colonization. PLoS ONE 12(12): e0190095. <https://doi.org/10.1371/journal.pone.0190095>

**Editor:** Axel Cloeckert, Institut National de la Recherche Agronomique, FRANCE

**Received:** October 9, 2017

**Accepted:** December 7, 2017

**Published:** December 21, 2017

**Copyright:** © 2017 Goto et al. This is an open access article distributed under the terms of the [Creative Commons Attribution License](https://creativecommons.org/licenses/by/4.0/), which permits unrestricted use, distribution, and reproduction in any medium, provided the original author and source are credited.

**Data Availability Statement:** All relevant data are within the paper and its Supporting Information files.

**Funding:** This work was supported in part by Japan society for the promotion of science (JSPS) KAKENHI (<http://www.jsps.go.jp/english/e-grants/index.html>), Grant Number JP16K08783. The funders had no role in study design, data collection and analysis, decision to publish, or preparation of the manuscript. There was no additional external funding received for this study.

## Abstract

Mucosal barrier formed by cationic antimicrobial peptides (CAMPs) is believed to be crucial for host protection from pathogenic gut infection. However, some pathogens can develop resistance to the CAMPs to survive in hosts. *Salmonella enterica* is a common cause of acute diarrhea. During the course of this disease, the pathogen must continuously colonize the gut lumen, which contains CAMPs. However, it is incompletely understood whether the resistance of *Salmonella* strains to CAMPs contributes to the development of gut infections. PhoPQ two-component system-dependent lipid A modifications confer resistance to CAMPs in *S. enterica* serovar Typhimurium. Therefore, we introduced mutations into the PhoPQ-regulated genes in an *S. Typhimurium* strain, obtaining *pagP ugtL* and *pmrA* mutant strains. Each mutant strain demonstrated a distinct spectrum of the resistance to CAMPs. Using streptomycin mouse model for *Salmonella* diarrhea, we show that the *pagP ugtL*, but not *pmrA*, mutant strain had a gut colonization defect. Furthermore, the *pagP ugtL*, but not *pmrA*, mutant strain had decreased outer membrane integrity and susceptibility to magainin 2, an alpha-helical CAMP. Taken together, the PagP- and UgtL-dependent resistance to CAMPs was demonstrated to contribute to sustained colonization in the gut. This may be due to the robust outer membrane of *S. Typhimurium*, inducing the resistance to alpha-helical CAMPs such as  $\alpha$ -defensins. Our findings indicate that the development of resistance to CAMPs is required for the *S. Typhimurium* gut infection.

## Introduction

Resistance to cationic antimicrobial peptides (CAMPs) represents a major virulence factor in the infectious stages of *Salmonella enterica* serovar Typhimurium (*S. Tm*). The PhoPQ-dependent modifications of the outer membrane lead to the development of *S. Tm* resistance [1, 2]. Lipid A modifications induce reduction of the anionic charge on the bacterial surface and a decrease in the bacterial surface membrane fluidity, allowing its escape from CAMP binding and membrane insertion. Therefore, *S. Tm* can survive and colonize the gut even in the presence of CAMPs.

**Competing interests:** The authors have declared that no competing interests exist.

The PhoPQ is a two-component system that controls the transcript levels of many genes associated with the resistance to CAMPs. The sensor PhoQ can be activated by several inducing factors, such as low  $Mg^{2+}$  levels [3], mildly acidic pH [4, 5], or CAMPs [6], which results in the phosphorylation of its cognate response regulator PhoP. The phosphorylated PhoP represents the active form of this molecule, able to bind to promoter regions, stimulating or repressing gene transcription. For example, the PhoP activation increases the expression of *pag* genes, such as *pagP* and *ugtL*, conferring resistance to defensin [7].

A number of studies on the PhoPQ-mediated resistance of *S. Tm* strains to antimicrobial peptides including CAMPs focused on the survival within macrophages and during systemic infections [8–16]. Despite the fact that CAMPs are expressed and secreted into the gut lumen, and subsequently specifically stimulate the PhoQ sensor [6], little is known whether the resistance to CAMPs is involved in the gut infection, *i.e.*, pathogen colonization in the gut. Therefore, we analyzed the role of PhoPQ-mediated resistance to CAMPs during *Salmonella*-induced diarrhea.

In this study, we focused on two distinct types of resistance to CAMPs based on different PhoPQ-dependent lipid A modifications by PagP and UgtL, or PmrA. PagP modifies lipid A molecules by adding palmitate, which results in the formation of lipid A with seven acyl chains and one palmitoyl group [17]. UgtL is a PhoQ accessory protein [18], which contributes to the formation of monophosphorylated lipid A [19]. Although each PagP- and UgtL-dependent lipid A modification contributes to the resistance of *S. Tm* to CAMPs, the synergy of these modifications confers more potent resistance than each individual modification [19]. PhoP can induce the production of lipid A with alternative modifications through activation of the PmrA response regulator [7]. PmrA-dependent lipid A modifications, such as the addition of 4-amino-4-deoxy-L-arabinose (Ara4N) [20, 21] and phosphoethanolamine (pEtN) [21] to the phosphate groups of lipid A, can reduce the negative charge of the bacterial cell surface, affecting the electrostatic interactions with CAMPs. Therefore, *pmrA* mutants are more susceptible to polymyxin B [7].

Here, we studied the role of the resistance to CAMPs during *S. Tm* colonization in the gut using the streptomycin mouse model of the acute *Salmonella* diarrhea [22, 23]. Our results suggest that the development of resistance to CAMPs is necessary for the sustained *S. Tm* colonization in the gut. The findings described here promote a better understanding of the role of resistance to CAMPs in pathogen colonization in the gut.

## Results and discussion

### PagP- and UgtL-, or PmrA-dependent resistance to antimicrobial peptides

To understand the resistance to CAMPs in *Salmonella*-induced diarrhea, we focused on two types of lipid A modifications induced by PagP and UgtL or PmrA. Previously, different lipid A modifications were shown to confer different types of *S. Tm* resistance to CAMPs [7, 19]. Here, we determined the minimum inhibitory concentrations (MICs) of two CAMPs, polymyxin B and protamine, towards *pagP ugtL* mutant (T230) or *pmrA* mutant (T141) (Table 1). Mutations in the *pagP* and *ugtL* genes were shown to attenuate the ability of *S. Tm* cells to resist protamine, but not polymyxin B. In contrast, *pmrA* mutant cells showed a decrease in the resistance to polymyxin B, but not to protamine. Furthermore, we performed an *in vitro* killing assay. Although T230 seemed to be killed by polymyxin B to some extent, similar results were obtained in this experiment (S1 Fig). These results confirmed that different lipid A modifications allow the resistance of cells to specific types of CAMPs. Therefore, we used these strains in further experiments in this study.

**Table 1. Minimal inhibitory concentrations (MIC) of cationic antimicrobial.**

| Strain                          | MIC (µg/ml) |           |
|---------------------------------|-------------|-----------|
|                                 | Polymyxin B | Protamine |
| <i>S. Tm</i> SL1344 (wild type) | 3.67        | 64.0      |
| T230 ( <i>pagP ugtL</i> )       | 3.00        | 44.0      |
| T141 ( <i>pmrA</i> )            | 2.20        | 61.3      |

MIC is described as the average (µg/ml) of at least six experiments.

<https://doi.org/10.1371/journal.pone.0190095.t001>

### *S. Tm* cells harboring mutations in the *pagP* and *ugtL* or *pmrA* genes can colonize the gut and induce the inflammatory responses

To demonstrate the role of lipid A modification-mediated resistance to CAMPs in the acute diarrhea model induced by *S. Tm*, we performed gut infection experiments using the streptomycin mouse model [22] and the CAMP-susceptible *S. Tm* strains. Streptomycin-pretreated C57BL/6 mice were infected with the *S. Tm* wild-type strain (SL1344), the *pagP ugtL* mutant cells (T230), or the *pmrA* mutant cells (T141) via the oral route ( $5 \times 10^7$  CFU in total, by gavage). At day 1–2 post infection (p.i.), we determined the bacterial loads in feces. Furthermore, at day 2 p.i., the mice were sacrificed and the colonization of the cecal lumen, the mesenteric lymph node (mLN), and spleen was analyzed. The analysis of feces showed that all analyzed strains had similar colonization levels at day 1 and 2 p.i. (Fig 1A). Colonization levels in the cecal content and the spleen did not significantly differ between the strains (Fig 1B and 1D). In mLN, the mutant strain T230 colonization levels were shown to be significantly reduced (Fig 1C). Furthermore, the expression of inflammatory cytokines (*TNF-α* and *IL-6*), chemokines (*Kc* and *Mip2*), and antimicrobial effector (*RegIIIβ*) was shown to be induced in mice infected with the *S. Tm* strains, compared with that in the controls (Fig 1E). Histopathological analyses of the cecum tissue demonstrated that the mice infected with the analyzed strains featured significant levels of gut inflammation (Fig 1F). These results indicate that PagP- and UgtL-, or PmrA-dependent lipid A modifications are not required for *S. Tm* growth at the initial infectious stage and the induction of inflammation during the development of acute colitis. Moreover, the resistance to CAMPs was demonstrated to play no role in the induction of *Salmonella*-associated diarrhea.

### PagP and UgtL, but not PmrA, contribute to sustained *S. Tm* colonization in the gut

Next, we investigated whether the resistance to CAMPs contributes to sustained *S. Tm* colonization in the gut. Attenuated *S. Tm* mutant cells, harboring type III secretion system 2 (*ttss-2*) mutations, allow investigation of the later stages of gut infections [24, 25]. Streptomycin-pretreated mice were infected with a 1:1 bacterial mixture of *ttss-2* mutant T145 ( $\Delta$ *ssaV::cat*) and T216 ( $\Delta$ *ssaV \Delta**pagP \Delta**ugtL::kan*), or *ttss-2* mutant T118 ( $\Delta$ *spiB::kan*) and T223 ( $\Delta$ *spiB \Delta**pmrA::cat*) via the oral route. Bacterial loads in murine feces were monitored daily for the next 7 days. T216 cells showed a colonization defect by day 3 p.i. (competitive index, C.I. 14.4; Fig 2A). Subsequently, until the finalization of the experiment at day 7 p.i., the defective colonization was observed. In contrast, T223 did not show any colonization defects, and this strain was shown to colonize the gut more efficiently than the parental strain T118 (C.I. at day 7 p.i. 0.45; Fig 2D). Similar results were obtained by analyzing the cecal content and mLN (Fig 2B, 2C, 2E and 2F).

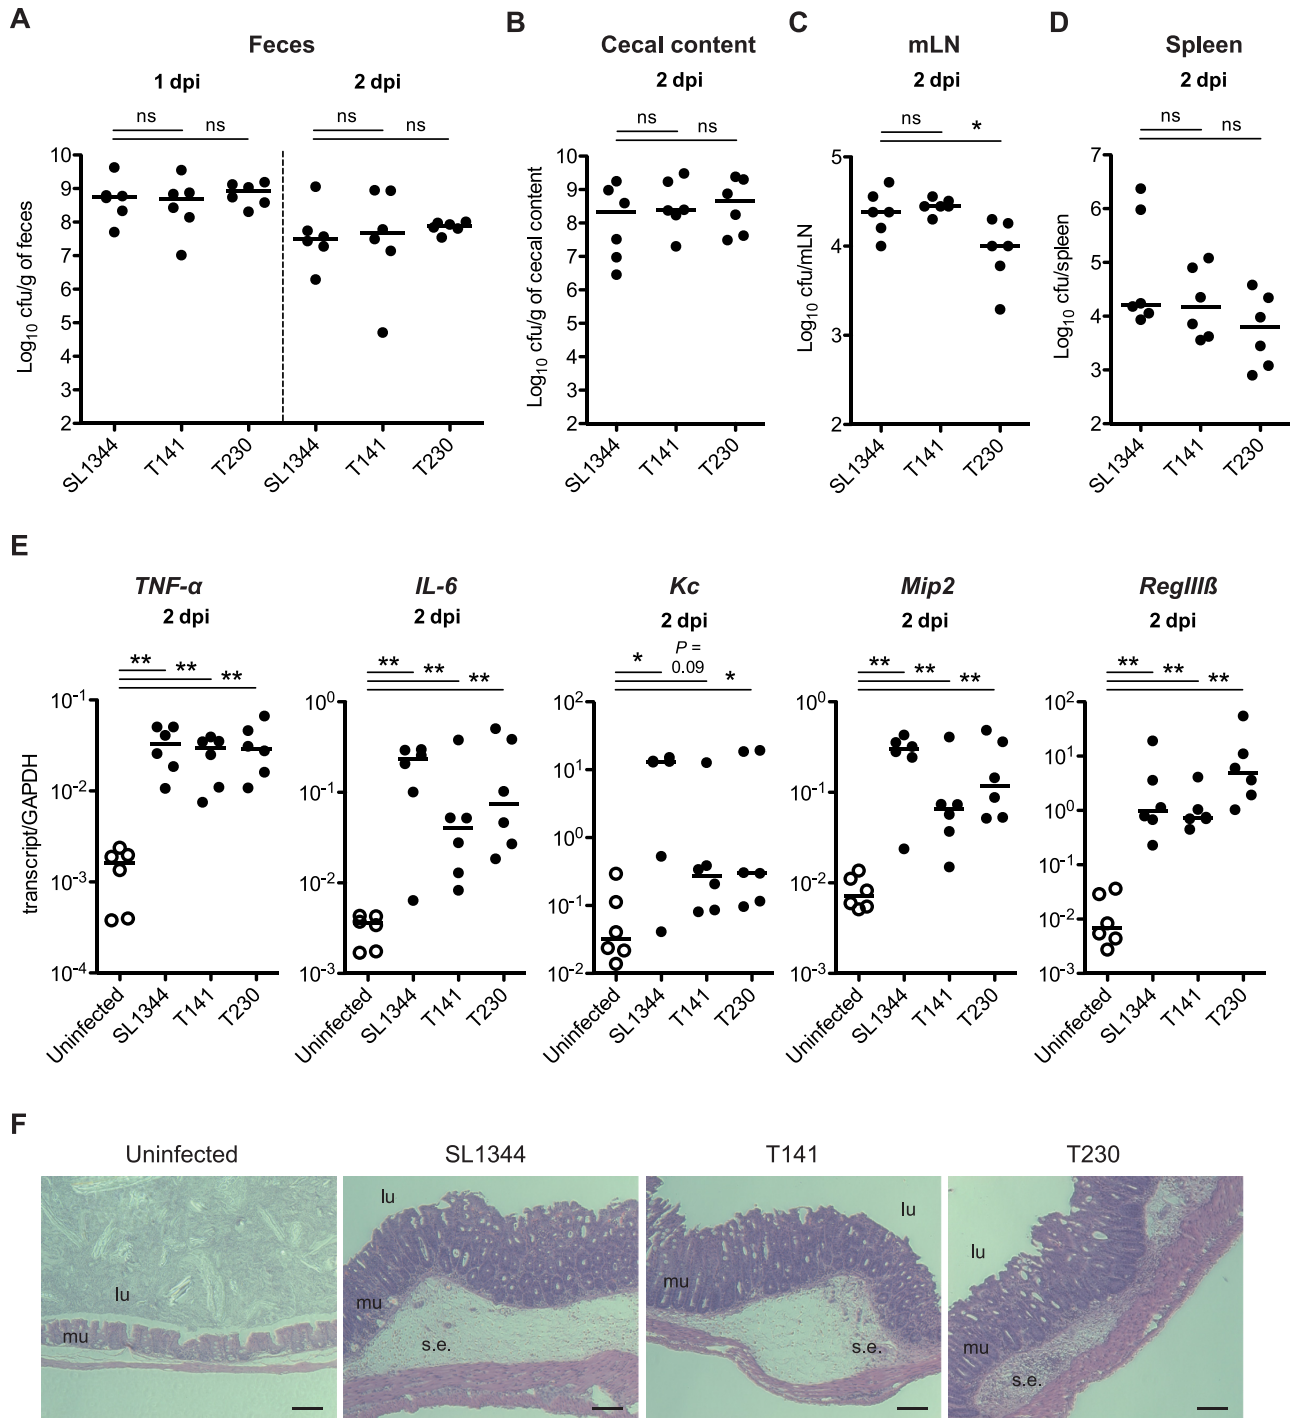

**Fig 1. *S. Tm pmrA* mutant and *pagP ugtL* mutant are capable of triggering gut colonization and inflammation.** Three groups of streptomycin-pretreated C57BL/6 mice (n = 6 per group) were infected for 2 days with the wild-type *S. Tm* strain (SL1344),  $\Delta pmrA::cat$  strain (T141) or  $\Delta pagP ugtL::kan$  strain (T230) by gavage. At 1 and 2 days post infection, *S. Tm* loads in the feces were determined. At 2 days postinfection (dpi), mice were sacrificed and *S. Tm* colonization of cecum, mLN, and spleen were examined. (A to D) The number of *S. Tm* CFU in different organs (feces (A), cecal content (B), mLN (C), spleen (D)). Horizontal bars, median; ns, not significant ( $P \geq 0.05$ ); \* $P < 0.05$ ; Mann-Whitney U test. (E) Transcript levels of inflammatory cytokines (*TNF-α* and *IL-6*), chemokines (*Kc* and *Mip2*) and antimicrobial effector (*RegIIIβ*) in cecal tissue. Horizontal bars, median; \* $P < 0.05$ ; \*\* $P < 0.01$ ; \*\*\* $P < 0.001$ ; Mann-Whitney U test. (F) Hematoxylin/eosin (H&E) stained cecal section (100 $\times$ ). Scale bar, 20  $\mu$ m. lu, lumen; mu, mucosa; s.e., submucosal edema.

<https://doi.org/10.1371/journal.pone.0190095.g001>

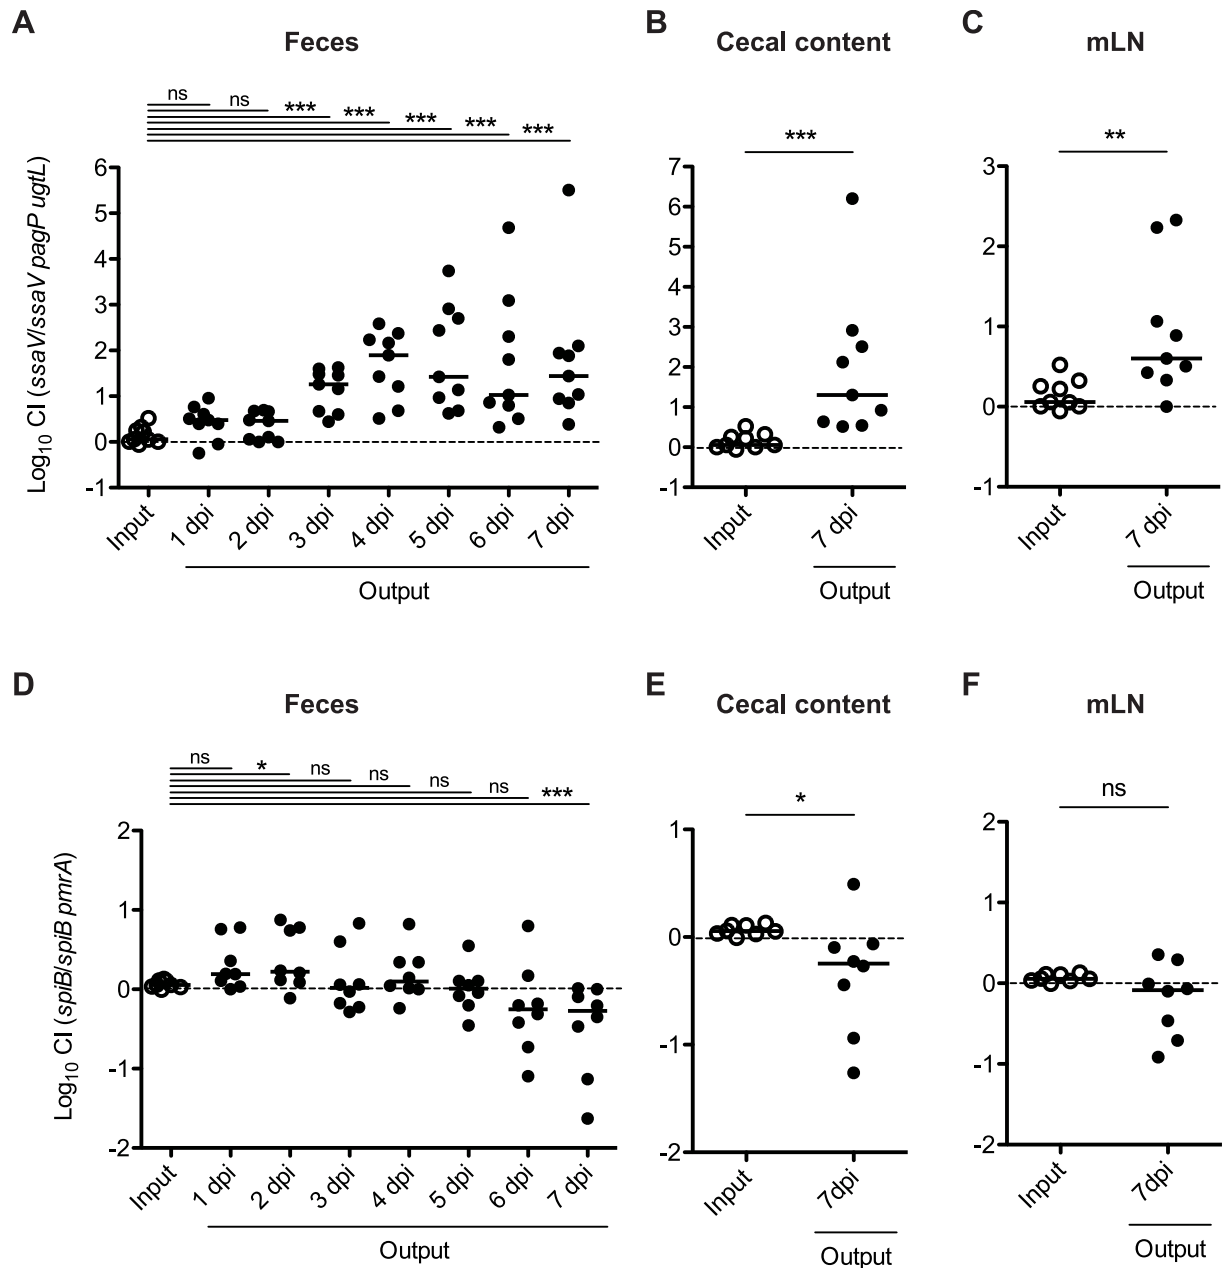

**Fig 2. *S. Tm* *pagP ugtL* mutant, but not *pmrA* mutant, is impaired in the sustained gut colonization in competitive infection.** Streptomycin-pretreated C57BL/6 mice (n = 8 or 9) were infected for 7 days with a 1:1 mixture (total  $1 \times 10^8$  CFU intragastrically) of *ssaV* mutant and *ssaV pagP ugtL* mutant, or *spiB* mutant and *spiB pmrA* mutant. *S. Tm* loads in feces (A and D), cecal content (B and E), and mLN (C and F) were determined by selective plating. Competitive infection indices (CI) were determined over 7 days. Horizontal bars, median; ns, not significant ( $P \geq 0.05$ ); \* $P < 0.05$ ; \*\* $P < 0.01$ ; \*\*\* $P < 0.001$ ; Mann-Whitney U test.

<https://doi.org/10.1371/journal.pone.0190095.g002>

To reveal whether deletions of both *pagP* and *ugtL* genes are required for the colonization defect of T216 strain, we further performed mouse infection experiments using mixed *S. Tm* strains: T145 ( $\Delta$ *ssaV::cat*) and T227 ( $\Delta$ *ssaV \Delta**pagP::kan*), or T145 and T228 ( $\Delta$ *ssaV \Delta**ugtL::kan*). In contrast to T216, T227 and T228 cells displayed no colonization defect at day 1, 3, 5, and 7 p.i. (S2 Fig). Rather, T228 cells colonized in the gut more efficiently than the parental strain

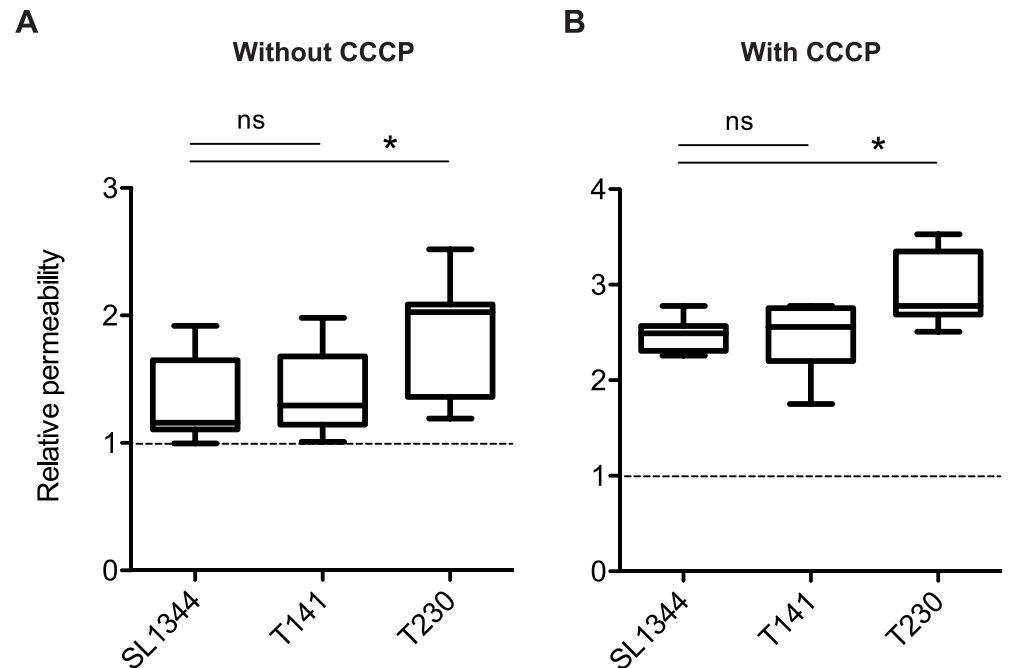

**Fig 3. *S. Tm* *pagP* *ugtL* mutant, but not *pmrA* mutant, is impaired in the outer membrane integrity.** The outer membrane permeability of wild-type *S. Tm* strain (SL1344),  $\Delta pmrA::cat$  strain (T141) or  $\Delta pagP$  *ugtL::kan* strain (T230) were measured using the EtBr influx assay [26, 27]. Outer membrane permeability was evaluated by comparing the sample without *S. Tm*, meaning that more than 1 indicates outer membrane permeability was increased. Two reactive conditions were performed without CCCP (A) or with CCCP (B). Box & whiskers plot: the whiskers denote minimum and maximum, and the black bars indicate medians. ns, not significant ( $P \geq 0.05$ ); \* $P < 0.05$ ; Mann-Whitney U test.

<https://doi.org/10.1371/journal.pone.0190095.g003>

T145 at day 1, 3, and 5 p.i. (S2 Fig). Furthermore, a colonization defect of T227 or T228 cells in the cecal content and mLN was not found (S2 Fig).

Collectively, these results suggest that the PagP- and UgtL-, but not PmrA-, resistance to CAMPs contributes to the sustained colonization of the gut by *S. Tm*.

### PagP and UgtL, but not PmrA, contribute to the construction of a robust outer membrane barrier

PhoPQ-dependent lipid A modifications provide the robust outer membrane barrier of *S. Tm* [1, 26]. Therefore, we next examined whether the PagP- and UgtL-dependent lipid A modifications are required for the generation of the robust outer membrane. To assess outer membrane barrier integrity, we used the ethidium bromide (EtBr) influx assay [26, 27]. EtBr is a well-known DNA-intercalating fluorescent dye that cannot pass through the outer membrane of Gram-negative bacterium. However, if the outer membrane integrity is compromised, EtBr can pass through the outer membrane, and subsequently traverse the cytoplasmic membrane and reach the cytosol [26]. In the bacterial cytosol, EtBr rapidly binds to intracellular nucleic acids, leading to an increase in fluorescence signal. We did not observe an increase in the fluorescence intensity in the *pmrA* mutant cells (T141), in comparison with that in the wild-type *S. Tm* strain cells (SL1344) (Fig 3A). In contrast, the enhanced signal intensity was observed in the *S. Tm* T230 cells harboring *pagP* and *ugtL* mutations (Fig 3A). Furthermore, carbonyl cyanide *meta*-chlorophenylhydrazone (CCCP) was added to the bacterial mixture to inhibit the bacterial efflux pumps, and this allowed us to detect enhanced fluorescence signals [26]. Here,

the obtained results were similar to those previously described (Fig 3B). Collectively, these results suggest that the PagP- and UgtL-dependent lipid A modifications, but not PmrA-dependent modifications, contribute to the robustness of the bacterial outer membrane.

### PagP and UgtL, but not PmrA, contribute to the resistance to magainin 2

In the gut, alpha-helical CAMPs ( $\alpha$ -CAMPs) called human defensin 5 (HD-5) or cryptdin represent the predominant CAMPs in humans or mice [28]. Therefore, we hypothesized that the colonization defect of *pagP ugtL* mutant in the gut is attributable to the  $\alpha$ -CAMP-mediated removal of *S. Tm* cells. We thus investigated whether the PagP- and UgtL-dependent lipid A modifications contribute to the development of resistance to magainin 2, an  $\alpha$ -CAMP. The wild-type *S. Tm* strain (SL1344) and the *pmrA* mutant strain (T141) were shown to be resistant to the magainin 2-mediated killing (Fig 4). In contrast, the *pagP ugtL* mutant strain (T230) was

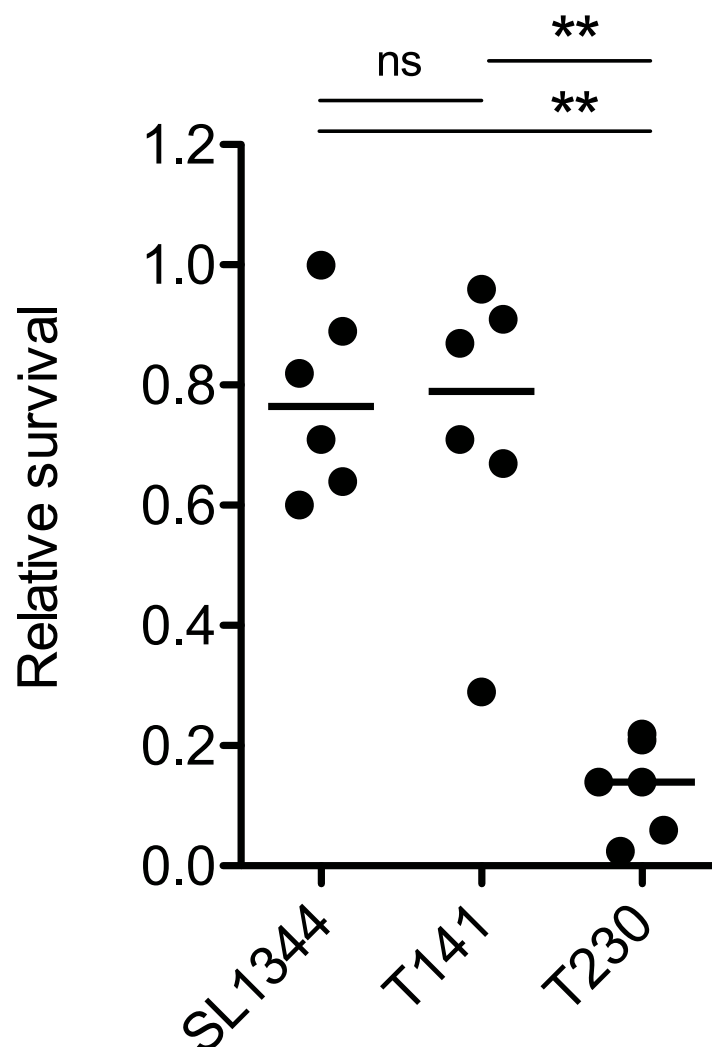

**Fig 4. *S. Tm pagP ugtL* mutant, but not *pmrA* mutant, is impaired in the resistance to magainin 2.** Wild-type *S. Tm* strain (SL1344),  $\Delta pmrA::cat$  strain (T141) or  $\Delta pagP ugtL::kan$  strain (T230) from the mid-logarithmic growth phase was incubated with magainin 2 (128  $\mu$ g/mL) for 30 min at 37°C. Bacterial survival was quantified by dilution-plating. Bacterial killing effect was evaluated by comparing the sample without magainin 2, meaning that less than 1 indicates killing effect was increased. Horizontal bars, median; ns, not significant ( $P \geq 0.05$ ); \* $P < 0.05$ ; \*\* $P < 0.01$ ; \*\*\* $P < 0.001$ ; Mann-Whitney U test.

<https://doi.org/10.1371/journal.pone.0190095.g004>

more sensitive to the  $\alpha$ -CAMP effects, in comparison with SL1344 and T141 strains (Fig 4). We next performed the complementation experiment to compensate for the loss of both *pagP* and *ugtL* genes. T145 ( $\Delta$ *ssaV::cat*) or T343 ( $\Delta$ *ssaV*  $\Delta$ *pagP*  $\Delta$ *ugtL*) or T364 ( $\Delta$ *ssaV*  $\Delta$ *pagP*  $\Delta$ *ugtL* harboring pMW118 and pACYC184), or T365 ( $\Delta$ *ssaV*  $\Delta$ *pagP*  $\Delta$ *ugtL* harboring pMW118 encoding *pagP* and pACYC184 encoding *ugtL*) were subjected to an *in vitro* killing assay with magainin 2. T343 and T364 strains were susceptible to magainin 2 in comparison with T145 (S3 Fig). In contrast, T365 strain was not killed by magainin 2 (S3 Fig), indicating that complementation with the plasmids encoding *pagP* or *ugtL* respectively restored the impaired resistance against magainin 2. The obtained results suggest that the attenuated resistance to  $\alpha$ -CAMPs may be attributable to the reduced levels of  $\Delta$ *pagP*  $\Delta$ *ugtL::kan* cells (T230) in the gut.

## Conclusions

The gut *Salmonella* lipid A may be modified by the PhoPQ two-component system, since the CAMPs can directly stimulate the PhoQ sensor, leading to the PhoP-dependent gene expression [6, 29]. In the intestinal lumen, the PhoPQ-regulated genes (*pagP*, *pagI*, and *pmrH*) were shown to be activated in a PhoPQ-dependent manner [30, 31]. Therefore, the PhoPQ-dependent lipid A modifications in the gut most likely are responsible for the resistance to CAMPs, allowing *Salmonella* cells to survive. Indeed, in the study by Woo *et al.*, *S. Tm* *phoP* mutant cells appeared to be unable to persist the murine gut, indicating that the PhoPQ system is involved in the *S. Tm* colonization in the gut [32]. Furthermore, a number of previous reports showing that the CAMPs play the protective role during oral *Salmonella* infections [11, 14, 16, 20, 33]. However, in most of these studies, antimicrobial effects of CAMPs were evaluated by investigating lethal systemic infections. Furthermore, it is unlikely that diarrhea was induced in the infected mice since the streptomycin mouse model was not employed in these studies. Therefore, the resistance of *S. Tm* to CAMPs during gut infections, and especially during the activation of host inflammatory response, was unclear. Here, we used the streptomycin mouse model to induce gut inflammation in order to elucidate the role of bacterial resistance to CAMPs during *Salmonella*-induced diarrhea. The findings presented here indicate that certain lipid A modifications by PagP and UgtL may contribute to sustained colonization in the gut. Furthermore, it may be concluded that these effects correlate with the presence of a robust outer membrane with low fluidity, which prevents the insertion of  $\alpha$ -CAMPs.

More recently, UgtL has been shown to be a PhoQ accessory protein activating the PhoPQ-regulated genes in response to certain conditions [18]. In acidic pH, lack of the *ugtL* gene results in reduced expression levels of the PhoPQ-regulated genes. Thus, UgtL-dependent PhoQ activation appears to be restricted to the specific condition, i.e., acidic pH, but not the presence of antimicrobial peptides [18]. Further studies will be needed to clarify precise mechanisms of the additive and synergy effects with PagP and UgtL on the *S. Tm* gut colonization.

In conclusion, the obtained data demonstrate for the first time that the robust outer membrane conferring the resistance to  $\alpha$ -CAMPs contributes to the *S. Tm* colonization in the gut. We demonstrated that the development of resistance to  $\alpha$ -CAMP is required for *S. Tm* colonization in the gut. Future studies, using CAMP knockout mice, may be necessary to establish the causal link between the resistance to CAMPs and the *S. Tm* colonization in the gut.

## Materials and methods

### Bacterial strains and plasmids

All strains used in this study are the derivatives of the *Salmonella enterica* serovar Typhimurium (*S. Tm*) streptomycin-resistant wild-type strain SL1344 (Table 2). Bacterial strains and plasmids used for complementation experiment are listed in Table 2. Gene mutations were



**Table 2. Strains and plasmids used in this study.**

| Strain   | Genotype                                                                               | Reference           |
|----------|----------------------------------------------------------------------------------------|---------------------|
| SL1344   | Wild-type <i>S. Typhimurium</i> , <i>hisG</i>                                          | [35]                |
| T141     | SL1344 $\Delta pmrA::cat$                                                              | This study          |
| T230     | SL1344 $\Delta pagP \Delta ugtL::aphT$                                                 | This study          |
| T145     | SL1344 $\Delta ssaV::cat$                                                              | This study          |
| T216     | SL1344 $\Delta ssaV \Delta pagP \Delta ugtL::aphT$                                     | This study          |
| T118     | SL1344 $\Delta spiB::aphT$                                                             | [25]                |
| T223     | SL1344 $\Delta spiB \Delta pmrA::cat$                                                  | This study          |
| T227     | SL1344 $\Delta ssaV \Delta pagP::aphT$                                                 | This study          |
| T228     | SL1344 $\Delta ssaV \Delta ugtL::aphT$                                                 | This study          |
| T343     | SL1344 $\Delta ssaV \Delta pagP \Delta ugtL$                                           | This study          |
| T364     | T343 harboring pMW118 and pACYC184                                                     | This study          |
| T365     | T343 harboring pT112 and pT115                                                         | This study          |
| Plasmid  | Genotype                                                                               | Reference           |
| pMW118   | Low-copy number expression vector                                                      | Nippon Gene         |
| pACYC184 | Middle-copy number expression vector                                                   | New England BioLabs |
| pT112    | pMW118 containing a 500 bp from the upstream region and coding region of <i>pagP</i>   | This study          |
| pT115    | pACYC184 containing a 500 bp from the upstream region and coding region of <i>ugtL</i> | This study          |

<https://doi.org/10.1371/journal.pone.0190095.t002>

generated by using the lambda/red homologous recombination [34]. Primers used for construction of *S. Tm* mutants are listed in S1 Table.

### Plasmid construction

The complementary plasmid pT112 was constructed using PCR fragments containing a 500 bp from the upstream region and coding region of *pagP* generated with primers PropagP-EcoRV-FW and pagP-SalI-RV and *S. Tm* SL1344 chromosomal DNA as template, which were digested with EcoRV and SalI, and then ligated between the SmaI and SalI sites of pMW118. The complementary plasmid pT115 was constructed using PCR fragments containing a 500 bp from the upstream region and coding region of *ugtL* generated with primers ProugtL-EcoRV-FW and ugtL-SalI-RV and *S. Tm* SL1344 chromosomal DNA as template, which were digested with EcoRV and SalI, and then ligated between the EcoRV and SalI sites of pACYC184. Primers used for construction of the complementation plasmid are listed in S1 Table.

### Determination of minimum inhibitory concentrations (MICs)

The overnight cultures of *S. Tm* strains were diluted and then inoculated onto the 96-well microtiter plates at the starting absorbance value determined at 600 nm ( $A_{600}$ ) of 0.025, in a total volume of 100  $\mu$ L Cation-adjusted Mueller-Hinton broth (CAMHB) supplemented with different concentrations of polymyxin B (Wako) and protamine (MP Biomedicals). After 20 h of incubation at 37°C, the  $A_{600}$  values were determined using a microplate reader (Bio-Rad). Each experiment was repeated in duplicate. A positive control contained no CAMPs whereas in the negative control, *S. Tm* cells were not present. MICs were determined as the lowest concentrations of CAMPs that were shown to inhibit bacterial growth by more than 50% in comparison with the growth of the positive control.

### Antimicrobial killing assay (*in vitro* killing assay)

Killing assay was performed as described previously, with minor modification [36]. Briefly, *S. Tm* cells at the mid-logarithmic or the stationary growth phase were washed and resuspended in PBS at the density of  $1-5 \times 10^7$  CFU/mL. The diluted bacterial suspension was treated with polymyxin B (1  $\mu$ g/ml; Wako), or protamine (0.5 mg/ml; MP Biomedicals), or magainin 2 (128  $\mu$ g/ml; LKT Laboratories, Inc.) at 37°C for 30 min. Following the incubation, the mixture was plated on the selective LB medium. The recovered bacterial levels were normalized to those of the control, where PBS was used instead of the antimicrobial peptides, yielding bacterial relative survival values.

### Mice and infection experiments

All mice used in this study are C57BL/6 mice, housed under the specific pathogen-free conditions in the Institute of Animal Experiments of the School of Pharmacy, Kitasato University, Japan. These infection experiments were performed as described previously [37]. Briefly, 6- to 13-week-old mice were deprived of food and water for 4 h, and then inoculated with 25 mg streptomycin sulfate (Wako Pure Chemical Industries) by gavage to attenuate the colonization resistance. Twenty-four hours later, mice were deprived of food and water, and then inoculated with bacteria ( $1 \times 10^8$  CFU) by gavage. To determine the bacterial loads in the colonic content, fresh fecal pellets were freshly collected, and homogenized in sterile phosphate-buffered saline (PBS) for the plating on MacConkey agar plates (Nissui Pharmaceutical) supplemented with the appropriate antibiotic(s). To monitor bacterial loads in luminal content and organs, cecal content, mLN and spleen were recovered from mice sacrificed by cervical dislocation or carbon dioxide inhalation at the indicated time points, and then homogenized in sterile PBS containing 0.5% tergitol and plated on MacConkey agar plates supplemented with the appropriate antibiotic(s).

### Histopathology

Parts of cecal tissue were fixed in 4% formaldehyde (Mildform, Wako Pure Chemical Industries) and embedded in paraffin. Cryosections were prepared, air-dried and stained with hematoxylin/eosin.

### Reverse transcription quantitative (q)PCR

The cecum was excised to a quarter part, and stored in the RLT buffer (Qiagen) at -80°C until further analyses. Total RNA was extracted from homogenized cecal tissue using the RNeasy Mini Kit (Qiagen). Five hundred microgram of total RNA was used for reverse transcription using TaqMan Reverse Transcription Reagents (ThermoFisher Scientific). qPCR was conducted using a CFX96 Real-Time PCR Detection System (Bio-Rad), using the SsoAdvanced Universal SYBR Green Supermix (Bio-Rad) or KAPA SYBR FAST qPCR Master Mix (Kapa Biosystems), according to the manufacturers' instructions. Relative mRNA expression was calculated using the  $\Delta$ Ct method with *GAPDH* as a reference gene [38]. Utilized primers in the analysis are shown in [S1 Table](#).

### EtBr influx assay

EtBr influx assay was performed as previously described [27]. Briefly, *S. Tm* cells grown to the mid-logarithmic growth phase were washed and resuspended in binding buffer (25 mM MES pH 6.0, 25 mM NaCl), and diluted to the optical density (OD)<sub>600</sub> of 0.4/mL in the binding buffer. When necessary, the bacterial suspensions were preincubated with CCCP (48  $\mu$ M) for

10 min. Following the addition of EtBr (24  $\mu$ M), the fluorescence signal intensity of the EtBr-nucleic acid complex was measured using SpectraMax M5 spectrofluorometer (Molecular Devices) with excitation and emission wavelengths of 544 and 590 nm, respectively.

## Statistical analysis

The exact Mann-Whitney U test was performed using the software GraphPad Prism. P values of less than 0.05 were considered to indicate statistical significance.

## Ethical statement

This study and all animal experiments were reviewed and approved by the Kitasato University Institutional Animal Care and Use Committee (Permit Number: A13-6, J96-1 and J13-1).

## Supporting information

**S1 Fig. PagP- and UgtL-, or PmrA-dependent resistance to antimicrobial peptides.** Wild-type *S. Tm* strain (SL1344),  $\Delta$ *pagP ugtL::kan* strain (T230) or  $\Delta$ *pmrA::cat* strain (T141) from the stationary growth phase was incubated with (A) polymyxin B (1  $\mu$ g/mL) or (B) protamine (0.5 mg/mL) for 30 min at 37°C. Bacterial survival was quantified by dilution-plating. Bacterial killing effect was evaluated by comparing the sample without the antimicrobial peptides, meaning that less than 1 indicates killing effect was increased. n = 9 (polymyxin B) or 7 (protamine). Horizontal bars, median; ns, not significant ( $P \geq 0.05$ ); \*\* $P < 0.01$ ; Mann-Whitney U test.

(EPS)

**S2 Fig. Mutation of *pagP* or *ugtL* gene alone confers no colonization defect.** Streptomycin-pretreated C57BL/6 mice (n = 11 or 12) were infected for 7 days with a 1:1 mixture (total  $1 \times 10^8$  CFU intragastrically) of *ssaV* mutant and *ssaV pagP* mutant, or *ssaV* mutant and *ssaV ugtL* mutant. *S. Tm* loads in feces (A and D), cecal content (B and E), and mLN (C and F) were determined by selective plating. Competitive infection indices (CI) were determined at 1, 3, 5 and 7 days post infection. Horizontal bars, median; ns, not significant ( $P \geq 0.05$ ); \* $P < 0.05$ ; \*\* $P < 0.01$ ; \*\*\* $P < 0.001$ ; Mann-Whitney U test.

(EPS)

**S3 Fig. Complementation of the *pagP* and *ugtL* mutations restores the attenuated resistance to magainin 2.**  $\Delta$ *ssaV::cat* (T145) or  $\Delta$ *ssaV \Delta**pagP \Delta**ugtL* (T343) or T343 harboring pMW118 and pACYC184 (T364) or T343 harboring pT112 encoding *pagP* (pMW-*pagP*) and pT115 encoding *ugtL* (pACYC-*ugtL*) (T365) from the mid-logarithmic growth phase was incubated with magainin 2 (128  $\mu$ g/mL) for 30 min at 37°C. Bacterial survival was quantified by dilution-plating. Bacterial killing effect was evaluated by comparing the sample without magainin 2, meaning that less than 1 indicates killing effect was increased. n = 6. Horizontal bars, median; ns, not significant ( $P \geq 0.05$ ); \*\* $P < 0.01$ ; Mann-Whitney U test.

(EPS)

**S1 Table. A list of primers used in this study.**

(XLSX)

## Acknowledgments

We are grateful to Rina Nakajima, Haruka Koga, Taiga Watanabe, and Tsuyoshi Ohtake for experimental assistance.

## Author Contributions

**Conceptualization:** Tsuyoshi Miki, Nobuhiko Okada.

**Data curation:** Tsuyoshi Miki.

**Formal analysis:** Ryosuke Goto, Tsuyoshi Miki.

**Funding acquisition:** Tsuyoshi Miki.

**Investigation:** Ryosuke Goto, Tsuyoshi Miki, Nao Nakamura, Mayuka Fujimoto.

**Validation:** Ryosuke Goto, Tsuyoshi Miki, Nobuhiko Okada.

**Writing – original draft:** Tsuyoshi Miki.

## References

1. Matamouros S, Miller SI. S. Typhimurium strategies to resist killing by cationic antimicrobial peptides. *Biochimica et biophysica acta*. 2015; 1848(11 Pt B):3021–5. <https://doi.org/10.1016/j.bbame.2015.01.013> PMID: 25644871.
2. Dalebroux ZD, Miller SI. Salmonellae PhoPQ regulation of the outer membrane to resist innate immunity. *Current opinion in microbiology*. 2014; 17:106–13. <https://doi.org/10.1016/j.mib.2013.12.005> PMID: 24531506
3. Garcia Vescovi E, Soncini FC, Groisman EA. Mg<sup>2+</sup> as an extracellular signal: environmental regulation of *Salmonella* virulence. *Cell*. 1996; 84(1):165–74. PMID: 8548821.
4. Choi J, Groisman EA. Acidic pH sensing in the bacterial cytoplasm is required for *Salmonella* virulence. *Molecular microbiology*. 2016; 101(6):1024–38. <https://doi.org/10.1111/mmi.13439> PMID: 27282333
5. Prost LR, Daley ME, Le Sage V, Bader MW, Le Moual H, Klevit RE, et al. Activation of the bacterial sensor kinase PhoQ by acidic pH. *Molecular cell*. 2007; 26(2):165–74. <https://doi.org/10.1016/j.molcel.2007.03.008> PMID: 17466620.
6. Bader MW, Sanowar S, Daley ME, Schneider AR, Cho U, Xu W, et al. Recognition of antimicrobial peptides by a bacterial sensor kinase. *Cell*. 2005; 122(3):461–72. <https://doi.org/10.1016/j.cell.2005.05.030> PMID: 16096064.
7. Gunn JS, Miller SI. PhoP-PhoQ activates transcription of *pmrAB*, encoding a two-component regulatory system involved in *Salmonella typhimurium* antimicrobial peptide resistance. *Journal of bacteriology*. 1996; 178(23):6857–64. PMID: 8955307.
8. Groisman EA, Chiao E, Lipps CJ, Heffron F. *Salmonella typhimurium* *phoP* virulence gene is a transcriptional regulator. *Proceedings of the National Academy of Sciences of the United States of America*. 1989; 86(18):7077–81. PMID: 2674945.
9. Miller SI, Kukral AM, Mekalanos JJ. A two-component regulatory system (*phoP phoQ*) controls *Salmonella typhimurium* virulence. *Proceedings of the National Academy of Sciences of the United States of America*. 1989; 86(13):5054–8. PMID: 2544889.
10. Rosenberger CM, Gallo RL, Finlay BB. Interplay between antibacterial effectors: a macrophage antimicrobial peptide impairs intracellular *Salmonella* replication. *Proceedings of the National Academy of Sciences of the United States of America*. 2004; 101(8):2422–7. <https://doi.org/10.1073/pnas.0304455101> PMID: 14983025.
11. Wilson CL, Ouellette AJ, Satchell DP, Ayabe T, Lopez-Boado YS, Stratman JL, et al. Regulation of intestinal alpha-defensin activation by the metalloproteinase matrilysin in innate host defense. *Science*. 1999; 286(5437):113–7. PMID: 10506557.
12. Brodsky IE, Ghori N, Falkow S, Monack D. Mig-14 is an inner membrane-associated protein that promotes *Salmonella typhimurium* resistance to CRAMP, survival within activated macrophages and persistent infection. *Molecular microbiology*. 2005; 55(3):954–72. <https://doi.org/10.1111/j.1365-2958.2004.04444.x> PMID: 15661016.
13. Strandberg KL, Richards SM, Gunn JS. Cathelicidin antimicrobial peptide expression is not induced or required for bacterial clearance during *Salmonella enterica* infection of human monocyte-derived macrophages. *Infection and immunity*. 2012; 80(11):3930–8. <https://doi.org/10.1128/IAI.00672-12> PMID: 22927052.
14. Strandberg KL, Richards SM, Tamayo R, Reeves LT, Gunn JS. An altered immune response, but not individual cationic antimicrobial peptides, is associated with the oral attenuation of Ara4N-deficient

- Salmonella enterica* serovar Typhimurium in mice. PLoS one. 2012; 7(11):e49588. <https://doi.org/10.1371/journal.pone.0049588> PMID: 23166721.
15. Roland KL, Martin LE, Esther CR, Spitznagel JK. Spontaneous *pmrA* mutants of *Salmonella typhimurium* LT2 define a new two-component regulatory system with a possible role in virulence. Journal of bacteriology. 1993; 175(13):4154–64. PMID: 8391535.
  16. Gunn JS, Ryan SS, Van Velkinburgh JC, Ernst RK, Miller SI. Genetic and functional analysis of a PmrA-PmrB-regulated locus necessary for lipopolysaccharide modification, antimicrobial peptide resistance, and oral virulence of *Salmonella enterica* serovar *typhimurium*. Infection and immunity. 2000; 68(11):6139–46. PMID: 11035717.
  17. Guo L, Lim KB, Poduje CM, Daniel M, Gunn JS, Hackett M, et al. Lipid A acylation and bacterial resistance against vertebrate antimicrobial peptides. Cell. 1998; 95(2):189–98. PMID: 9790526.
  18. Choi J, Groisman EA. Activation of master virulence regulator PhoP in acidic pH requires the *Salmonella*-specific protein UgtL. Science signaling. 2017; 10(494). <https://doi.org/10.1126/scisignal.aan6284> PMID: 28851823.
  19. Shi Y, Cromie MJ, Hsu FF, Turk J, Groisman EA. PhoP-regulated *Salmonella* resistance to the antimicrobial peptides magainin 2 and polymyxin B. Molecular microbiology. 2004; 53(1):229–41. <https://doi.org/10.1111/j.1365-2958.2004.04107.x> PMID: 15225317.
  20. Gunn JS, Lim KB, Krueger J, Kim K, Guo L, Hackett M, et al. PmrA-PmrB-regulated genes necessary for 4-aminoarabinose lipid A modification and polymyxin resistance. Molecular microbiology. 1998; 27(6):1171–82. PMID: 9570402.
  21. Zhou Z, Ribeiro AA, Lin S, Cotter RJ, Miller SI, Raetz CR. Lipid A modifications in polymyxin-resistant *Salmonella typhimurium*: PMRA-dependent 4-amino-4-deoxy-L-arabinose, and phosphoethanolamine incorporation. The Journal of biological chemistry. 2001; 276(46):43111–21. <https://doi.org/10.1074/jbc.M106960200> PMID: 11535603.
  22. Kaiser P, Diard M, Stecher B, Hardt WD. The streptomycin mouse model for *Salmonella* diarrhea: functional analysis of the microbiota, the pathogen's virulence factors, and the host's mucosal immune response. Immunol Rev. 2012; 245(1):56–83. Epub 2011/12/16. <https://doi.org/10.1111/j.1600-065X.2011.01070.x> PMID: 22168414.
  23. Wotzka SY, Nguyen BD, Hardt WD. *Salmonella* Typhimurium Diarrhea Reveals Basic Principles of Enteropathogen Infection and Disease-Promoted DNA Exchange. Cell host & microbe. 2017; 21(4):443–54. <https://doi.org/10.1016/j.chom.2017.03.009> PMID: 28407482.
  24. Endt K, Stecher B, Chaffron S, Slack E, Tchitchek N, Benecke A, et al. The microbiota mediates pathogen clearance from the gut lumen after non-typhoidal *Salmonella* diarrhea. PLoS pathogens. 2010; 6(9):e1001097. <https://doi.org/10.1371/journal.ppat.1001097> PMID: 20844578.
  25. Miki T, Goto R, Fujimoto M, Okada N, Hardt WD. The Bactericidal Lectin RegIIIbeta Prolongs Gut Colonization and Enteropathy in the Streptomycin Mouse Model for *Salmonella* Diarrhea. Cell host & microbe. 2017; 21(2):195–207. <https://doi.org/10.1016/j.chom.2016.12.008> PMID: 28111202.
  26. Murata T, Tseng W, Guina T, Miller SI, Nikaido H. PhoPQ-mediated regulation produces a more robust permeability barrier in the outer membrane of *Salmonella enterica* serovar *typhimurium*. Journal of bacteriology. 2007; 189(20):7213–22. <https://doi.org/10.1128/JB.00973-07> PMID: 17693506.
  27. Miki T, Hardt WD. Outer membrane permeabilization is an essential step in the killing of gram-negative bacteria by the lectin RegIIIbeta. PLoS one. 2013; 8(7):e69901. <https://doi.org/10.1371/journal.pone.0069901> PMID: 23922847.
  28. Salzman NH, Underwood MA, Bevins CL. Paneth cells, defensins, and the commensal microbiota: a hypothesis on intimate interplay at the intestinal mucosa. Seminars in immunology. 2007; 19(2):70–83. <https://doi.org/10.1016/j.smim.2007.04.002> PMID: 17485224.
  29. Alpuche Aranda CM, Swanson JA, Loomis WP, Miller SI. *Salmonella typhimurium* activates virulence gene transcription within acidified macrophage phagosomes. Proceedings of the National Academy of Sciences of the United States of America. 1992; 89(21):10079–83. PMID: 1438196.
  30. Merighi M, Ellermeier CD, Slauch JM, Gunn JS. Resolvase-in vivo expression technology analysis of the *Salmonella enterica* serovar Typhimurium PhoP and PmrA regulons in BALB/c mice. Journal of bacteriology. 2005; 187(21):7407–16. <https://doi.org/10.1128/JB.187.21.7407-7416.2005> PMID: 16237024.
  31. Richards SM, Strandberg KL, Conroy M, Gunn JS. Cationic antimicrobial peptides serve as activation signals for the *Salmonella* Typhimurium PhoPQ and PmrAB regulons in vitro and in vivo. Frontiers in cellular and infection microbiology. 2012; 2:102. <https://doi.org/10.3389/fcimb.2012.00102> PMID: 22919691.
  32. Woo H, Okamoto S, Guiney D, Gunn JS, Fierer J. A model of *Salmonella* colitis with features of diarrhea in SLC11A1 wild-type mice. PLoS one. 2008; 3(2):e1603. <https://doi.org/10.1371/journal.pone.0001603> PMID: 18270590.

33. Salzman NH, Ghosh D, Huttner KM, Paterson Y, Bevins CL. Protection against enteric salmonellosis in transgenic mice expressing a human intestinal defensin. *Nature*. 2003; 422(6931):522–6. <https://doi.org/10.1038/nature01520> PMID: 12660734.
34. Datsenko KA, Wanner BL. One-step inactivation of chromosomal genes in *Escherichia coli* K-12 using PCR products. *Proceedings of the National Academy of Sciences of the United States of America*. 2000; 97(12):6640–5. <https://doi.org/10.1073/pnas.120163297> PMID: 10829079.
35. Hoiseth SK, Stocker BA. Aromatic-dependent *Salmonella typhimurium* are non-virulent and effective as live vaccines. *Nature*. 1981; 291(5812):238–9. Epub 1981/05/21. PMID: 7015147.
36. Miki T, Holst O, Hardt WD. The bactericidal activity of the C-type lectin RegIIIbeta against Gram-negative bacteria involves binding to lipid A. *The Journal of biological chemistry*. 2012; 287(41):34844–55. <https://doi.org/10.1074/jbc.M112.399998> PMID: 22896700.
37. Barthel M, Hapfelmeier S, Quintanilla-Martinez L, Kremer M, Rohde M, Hogardt M, et al. Pretreatment of mice with streptomycin provides a *Salmonella enterica* serovar Typhimurium colitis model that allows analysis of both pathogen and host. *Infection and immunity*. 2003; 71(5):2839–58. <https://doi.org/10.1128/IAI.71.5.2839-2858.2003> PMID: 12704158.
38. Livak KJ, Schmittgen TD. Analysis of relative gene expression data using real-time quantitative PCR and the 2<sup>-</sup>(Delta Delta C(T)) Method. *Methods*. 2001; 25(4):402–8. <https://doi.org/10.1006/meth.2001.1262> PMID: 11846609.
